# Supplementary material for: Experimental evidence of chemical exchange over the β(1→3) glycosidic linkage and hydrogen bonding involving hydroxy protons in hyaluronan oligosaccharides by NMR spectroscopy
Source: Royal Society of Chemistry journal article supplement (doi:10.1039/b927159g), 2010-01-01
Supplement: b927159g.pdf [file b927159g.pdf]

Electronic Supplementary Information for

**Experimental evidence of chemical exchange over the  $\beta(1\rightarrow3)$  glycosidic linkage and hydrogen bonding involving hydroxy protons in hyaluronan oligosaccharides by NMR spectroscopy**

Gustav Nestor, Lennart Kenne and Corine Sandström\*

Department of Chemistry, Swedish University of Agricultural Sciences,

P. O. Box 7015, SE-750 07 Uppsala, Sweden

\*Corresponding author: corine.sandstrom@kemi.slu.se

Chemical shifts (ppm) of aliphatic protons in GlcNAc, GlcA,  $\Delta$ HA<sub>2</sub>,  $\Delta$ HA<sub>4</sub>,  $\Delta$ HA<sub>6</sub> and  $\Delta$ HA<sub>8</sub> at -5 °C in 85% H<sub>2</sub>O/15% acetone-*d*<sub>6</sub>.

|                                   |                                      | GlcNAc/GlcA | $\Delta$ HA <sub>2</sub> | $\Delta$ HA <sub>4</sub> | $\Delta$ HA <sub>6</sub> | $\Delta$ HA <sub>8</sub> |
|-----------------------------------|--------------------------------------|-------------|--------------------------|--------------------------|--------------------------|--------------------------|
| N <sub>1<math>\alpha</math></sub> | C(1)H                                | 5.21        | 5.16                     | 5.15                     | 5.15                     | 5.15                     |
|                                   | C(2)H                                | 3.87        | 4.04                     | 4.05                     | 4.05                     | 4.05                     |
|                                   | C(3)H                                | 3.78        | 4.04                     | 3.91                     | 3.91                     | 3.91                     |
|                                   | C(4)H                                | 3.50        | 3.56                     | 3.57                     | 3.57                     | 3.57                     |
|                                   | C(5)H                                | 3.86        | 3.91                     | 3.88                     | 3.89                     | 3.89                     |
|                                   | C(6)H                                | 3.84        | 3.84                     | 3.82                     | 3.83                     | 3.83                     |
|                                   | C(6)H'                               | 3.80        | 3.84                     | 3.82                     | 3.83                     | 3.83                     |
|                                   | CH <sub>3</sub>                      | 2.06        | 2.08                     | 2.03                     | 2.03                     | 2.03                     |
| N <sub>1<math>\beta</math></sub>  | C(1)H                                | 4.71        | 4.77                     | 4.72                     | 4.72                     | 4.71                     |
|                                   | C(2)H                                | 3.70        | 3.85                     | 3.85                     | 3.85                     | 3.85                     |
|                                   | C(3)H                                | 3.53        | 3.85                     | 3.72                     | 3.71                     | 3.70                     |
|                                   | C(4)H                                | 3.47        | 3.51                     | 3.54                     | 3.54                     | 3.53                     |
|                                   | C(5)H                                | 3.46        | 3.51                     | 3.48                     | 3.48                     | 3.48                     |
|                                   | C(6)H                                | 3.92        | 3.92                     | 3.90                     | 3.90                     | 3.89                     |
|                                   | C(6)H'                               | 3.75        | 3.78                     | 3.77                     | 3.76                     | 3.77                     |
|                                   | CH <sub>3</sub>                      | 2.06        | 2.08                     | 2.03                     | 2.03                     | 2.03                     |
| G                                 | C(1)H <sub><math>\alpha</math></sub> | 5.25        |                          | 4.53                     | 4.53                     | 4.52                     |
|                                   | C(1)H <sub><math>\beta</math></sub>  | 4.64        |                          | 4.49                     | 4.48                     | 4.48                     |
|                                   | C(2)H                                | 3.29        |                          | 3.38                     | 3.37                     | 3.37                     |
|                                   | C(3)H                                | 3.50        |                          | 3.60                     | 3.60                     | 3.60                     |
|                                   | C(4)H                                | 3.52        |                          | 3.74                     | 3.74                     | 3.73                     |
|                                   | C(5)H                                | 3.73        |                          | 3.77                     | 3.76                     | 3.75                     |
| N                                 | C(1)H                                |             |                          |                          | 4.54                     | 4.53                     |
|                                   | C(2)H                                |             |                          |                          | 3.86                     | 3.86                     |
|                                   | C(3)H                                |             |                          |                          | 3.71                     | 3.71                     |
|                                   | C(4)H                                |             |                          |                          | 3.55                     | 3.54                     |
|                                   | C(5)H                                |             |                          |                          | 3.48                     | 3.48                     |
|                                   | C(6)H                                |             |                          |                          | 3.93                     | 3.93                     |
|                                   | C(6)H'                               |             |                          |                          | 3.80                     | 3.79                     |
|                                   | CH <sub>3</sub>                      |             |                          |                          | 2.04                     | 2.04                     |
| N <sub>n-1</sub>                  | C(1)H                                |             |                          | 4.58                     | 4.57                     | 4.57                     |
|                                   | C(2)H                                |             |                          | 3.85                     | 3.84                     | 3.84                     |
|                                   | C(3)H                                |             |                          | 3.82                     | 3.82                     | 3.81                     |
|                                   | C(4)H                                |             |                          | 3.52                     | 3.51                     | 3.51                     |
|                                   | C(5)H                                |             |                          | 3.52                     | 3.51                     | 3.51                     |
|                                   | C(6)H                                |             |                          | 3.93                     | 3.93                     | 3.93                     |
|                                   | C(6)H'                               |             |                          | 3.80                     | 3.80                     | 3.79                     |
|                                   | CH <sub>3</sub>                      |             |                          | 2.09                     | 2.09                     | 2.08                     |
| G <sub>n</sub>                    | C(1)H                                |             | 5.20                     | 5.18                     | 5.17                     | 5.18                     |
|                                   | C(2)H                                |             | 3.77                     | 3.76                     | 3.76                     | 3.75                     |
|                                   | C(3)H                                |             | 4.17                     | 4.15                     | 4.15                     | 4.15                     |
|                                   | C(4)H                                |             | 5.86                     | 5.86                     | 5.86                     | 5.86                     |
